# Supplementary material for: Developing a Healthy Environment Assessment Tool (HEAT) to Address Heat-Health Vulnerability in South African Towns in a Warming World
Source: MDPI journal article supplement (doi:10.3390/ijerph20042852), 2023-02-06
Supplement: s1 [file s1]

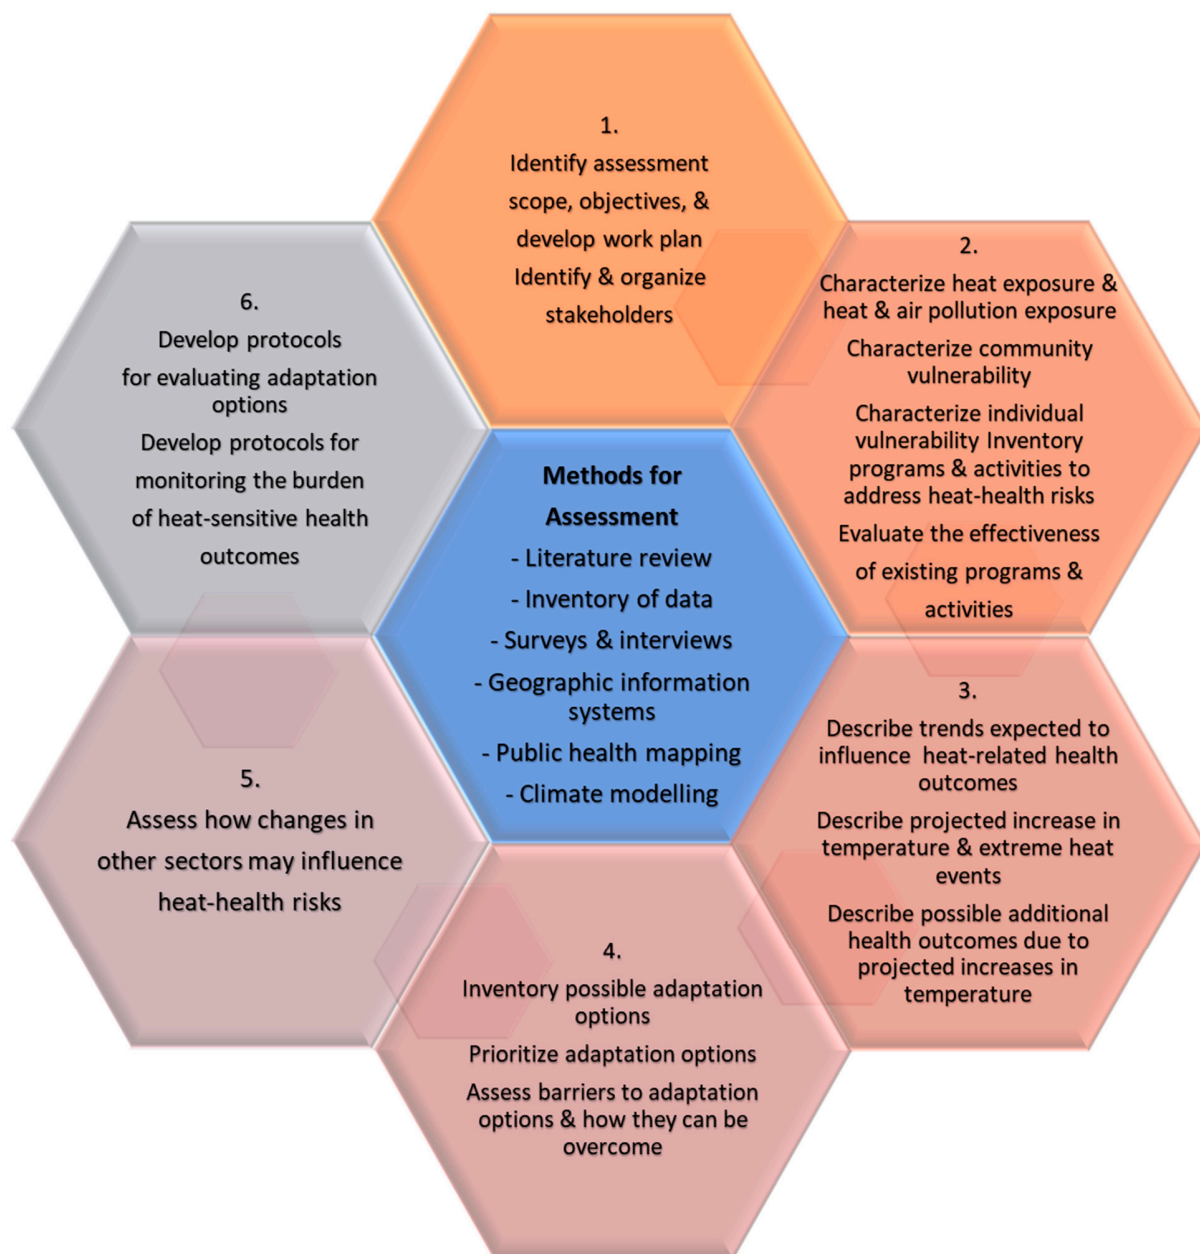

**Figure S1.** The six basic steps involved in an inclusive assessment of health vulnerability to life-threatening heat events.
