# Supplementary material for: Developing a Healthy Environment Assessment Tool (HEAT) to Address Heat-Health Vulnerability in South African Towns in a Warming World
Source: MDPI journal article supplement (doi:10.3390/ijerph20042852), 2023-02-06
Supplement: s1 [file s1]

**Table S1. (a)** Example assessment for Ward 'X' using the HEAT tool and symbols that explain critical elements of each indicator as identified in the RLM IDP. **(b)** A detailed key to illustrate the types of facilities, activities and services in each category used to calculate the risk score.

| (a)                     |                                                                                     |                                                                                   |                                                                                     |                                                                                     |                                                                                                                                                                            |                                                                                     |                                                                                       |                                                                                     |                  |
|-------------------------|-------------------------------------------------------------------------------------|-----------------------------------------------------------------------------------|-------------------------------------------------------------------------------------|-------------------------------------------------------------------------------------|----------------------------------------------------------------------------------------------------------------------------------------------------------------------------|-------------------------------------------------------------------------------------|---------------------------------------------------------------------------------------|-------------------------------------------------------------------------------------|------------------|
| Risk                    | Heat-Health Vulnerability Indicators                                                |                                                                                   |                                                                                     |                                                                                     |                                                                                                                                                                            |                                                                                     |                                                                                       |                                                                                     | Score            |
| Risk level assessed as: | Population                                                                          | Poverty                                                                           | Education                                                                           | Access to medical facilities                                                        | Water and sanitation                                                                                                                                                       | Transport                                                                           | Community Centres                                                                     | Green spaces                                                                        | Suburb/ward risk |
| High                    |    |  |                                                                                     |                                                                                     |                                                                                         |                                                                                     |                                                                                       |                                                                                     | 2.6              |
| Medium                  |                                                                                     |                                                                                   |    |                                                                                     | <br> |                                                                                     |                                                                                       |  |                  |
| Low                     |                                                                                     |  |                                                                                     |  |                                                                                                                                                                            |  |    |                                                                                     |                  |
| Score                   | 3                                                                                   | 4                                                                                 | 2                                                                                   | 1                                                                                   | 7                                                                                                                                                                          | 1                                                                                   | 1                                                                                     | 2                                                                                   |                  |
| (b)                     |                                                                                     |                                                                                   |                                                                                     |                                                                                     |                                                                                                                                                                            |                                                                                     |                                                                                       |                                                                                     |                  |
|                         |    | Disabled                                                                          |    | Business centres                                                                    |                                                                                         | Youth centre / Community centre / hall                                              |    | Ambulance                                                                           |                  |
|                         |    | Elderly                                                                           |    | Marketplace / shops                                                                 |                                                                                         | Library                                                                             |    | Unemployed or high drop-out rate                                                    |                  |
|                         |  | Children or orphans                                                               |  | Sports centre / recreational facilities                                             |                                                                                       | Toilets                                                                             |  | Electricity                                                                         |                  |
|                         |  | School                                                                            |  | Mobile clinic                                                                       |                                                                                       | Sanitation and sewage                                                               |  | High crime / theft rate                                                             |                  |
|                         |  | RDP or informal houses                                                            |  | Business centres                                                                    |                                                                                       | Water                                                                               |  | Green spaces, parks, or open land                                                   |                  |
|                         |  | Houses / private land                                                             |  | Clinic                                                                              |                                                                                       | Taxi rank or transport                                                              |  | Substance abuse                                                                     |                  |
